# Supplementary material
Source: publisher figshare collection journal article supplement (https://frontiersin.figshare.com/ndownloader/files/28141620)
Supplement: Supplementary file 1 [file 28141620]

**Supplementary material 1**

**Frequency (filled cells) and order of mention (sequence of numbers) of the varieties of araq papas recorded in interviews and workshops in the communities studied. The information was the base for estimating the Sutrop and Smith indexes reported in Table 2. Names of persons are abbreviated to respect the anonymity, numbers in parentheses are the participants in workshops.**

| Variety | Haquira group (6) | Alf.  Patahuasi (2) | Jua.  Patahuasi (3) | Workshop Llaccua (7) | Workshop Llaccua (4) | Llaccua  (2) | Workshop Ccocha (5) |
| --- | --- | --- | --- | --- | --- | --- | --- |
| Chabka-Qabka | 1 |  | 5 | 3 |  |  |  |
| Shakiña-Yuraq schaquiña-Schakiña blanca | 2 |  | 1 | 5 |  |  |  |
| Shakiña paccus |  | 4 | 4 |  |  |  |  |
| Shakiña runcu |  | 5 | 7 |  |  |  |  |
| Schakiña puca-Puca schaquiña- schaquiña roja |  | 6 | 6 | 4 |  |  |  |
| Schaquiña tellio-Tellio schaquiña |  |  |  | 6 |  |  |  |
| Schaquiña morada |  |  |  |  |  |  |  |
| Schaquiña redonda |  |  |  |  |  |  | 1 |
| Schaquiña larga |  |  |  |  |  |  | 2 |
| P’accush (amarilla) |  |  |  |  | 3 |  |  |
| Yana p’accush | 3 |  |  |  |  |  |  |
| Yuraq p'accush |  |  |  |  |  |  |  |
| Koyu paccush |  |  |  |  |  |  |  |
| Azulñahui paccush |  |  |  |  |  |  |  |
| Siccapisayu paccus |  | 1 | 3 |  |  |  |  |
| Siccapisayu runcu |  | 2 | 2 |  |  |  |  |
| Siccapisayu puca |  | 3 | 9 |  |  |  |  |
| Runcu |  |  |  |  |  | 1 | 4 |
| Runcu puca-puca runcu |  | 7 | 8 |  |  | 4 |  |
| Runcu paccus |  | 8 | 11 |  |  |  |  |
| Azul runcu |  |  |  |  | 1 | 2 |  |
| Yana runcu-Yara runcu |  |  |  |  | 2 | 3 |  |
| Chuchucoronta |  | 9 | 10 |  |  |  |  |
| Cuchicoronta |  |  |  | 7 |  | 8 |  |
| Quistillio |  | 10 | 12 | 9 |  | 10 |  |
| Quistillio puca |  | 11 |  |  |  |  |  |
| P'ocoya |  | 12 | 13 |  |  |  |  |
| Uaña |  | 13 | 14 |  | 4 | 5 |  |
| Yuraq uaña |  |  |  | 1 | 5 | 7 |  |
| Azul uaña |  |  |  | 2 | 6 | 6 | 6 |
| Uchu uaña |  |  |  |  |  |  |  |
| Ccatum uaña |  |  |  |  |  |  |  |
| Uaña amarilla |  |  |  |  |  |  | 5 |
| Uaña redonda |  |  |  |  |  |  |  |
| Uaña larga |  |  |  |  |  |  |  |
| Antama |  |  |  | 8 |  | 9 |  |
| Puca antama |  |  |  |  |  |  |  |
| Chuño araqa (special for soups) |  |  |  |  |  |  | 7 |
| Chuño araqa azul |  |  |  |  |  |  | 8 |
| Azul suncu |  |  |  |  |  |  |  |
| Yuraq suncu |  |  |  |  |  |  |  |
| Sinqapa |  |  |  |  |  |  | 3 |
| Waka castillio |  |  |  |  |  |  |  |
| Zenka pizaya |  |  |  |  |  |  |  |
| Sucuptco |  |  |  |  |  |  |  |
| Suzu |  |  |  |  |  |  |  |
| Karu aracca |  |  |  |  |  |  |  |
| Yana putis |  |  |  |  |  |  |  |
| Uropaglia |  |  |  |  |  |  |  |
| Poccoya-Puccoya |  |  |  |  |  |  |  |
| Chiwaco-Chihuaco |  |  |  |  |  |  |  |
| Loye cocha |  |  |  |  |  |  |  |
| Ccapa quiña |  |  |  |  |  |  |  |
| Laicusha |  |  |  |  |  |  |  |

**Frequency (filled cells) and order of mention (sequence of numbers) of the varieties of araq papas recorded in interviews and workshops in the communities studied. The information was the base for estimating the Sutrop and Smith indexes reported in Table 2. Names of persons are abbreviated to respect the anonymity, numbers in parentheses are the participants in workshops.**

| Variety | Ccocha (3) | Hip. Quiñota (2) | Quiñota  Group  (4) | Cel.  Llaccua | Mat. Llaccua | Edi. Llaccua | Vict. Cconchayoc (2) |
| --- | --- | --- | --- | --- | --- | --- | --- |
| Chabka-Qabka |  |  |  |  |  |  |  |
| Shakiña-Yuraq schaquiña-Schakiña blanca |  | 1 | 2 |  |  |  |  |
| Shakiña paccus |  |  |  |  |  |  |  |
| Shakiña runcu |  |  |  |  |  |  |  |
| Schakiña puca-Puca schaquiña- schaquiña roja |  | 2 | 1 |  |  |  |  |
| Schaquiña tellio-Tellio schaquiña |  |  |  |  |  |  |  |
| Schaquiña morada |  | 3 | 3 |  |  |  |  |
| Schaquiña redonda | 2 |  |  |  |  |  |  |
| Schaquiña larga | 3 |  |  |  |  |  |  |
| P’accush (amarilla) |  |  | 4 | 3 | 4 | 4 | 3 |
| Yana p’accush |  |  | 5 |  |  |  |  |
| Yuraq p'accush |  |  |  | 6 | 5 | 6 | 9 |
| Koyu paccush |  |  |  | 12 |  |  |  |
| Azulñahui paccush |  |  |  |  |  |  | 8 |
| Siccapisayu paccus |  |  |  |  |  |  |  |
| Siccapisayu runcu |  |  |  |  |  |  |  |
| Siccapisayu puca |  |  |  |  |  |  |  |
| Runcu | 1 |  | 6 | 1 | 1 | 1 | 1 |
| Runcu puca-puca runcu |  |  |  |  |  |  |  |
| Runcu paccus |  |  |  |  |  |  |  |
| Azul runcu |  |  |  |  |  |  |  |
| Yana runcu-Yara runcu |  |  |  |  |  |  |  |
| Chuchucoronta |  |  | 7 |  |  |  |  |
| Cuchicoronta |  |  |  | 4 | 6 | 3 |  |
| Quistillio |  |  |  |  |  |  |  |
| Quistillio puca |  |  |  |  |  |  |  |
| P'ocoya |  |  |  |  |  |  |  |
| Uaña |  |  |  |  |  |  | 4 |
| Yuraq uaña |  |  |  |  |  |  |  |
| Azul uaña | 4 |  |  |  | 10 | 9 |  |
| Uchu uaña |  |  |  | 8 | 9 | 8 |  |
| Ccatum uaña |  |  |  | 9 | 8 | 7 |  |
| Uaña amarilla | 5 |  |  |  |  |  |  |
| Uaña redonda |  |  |  | 2 | 2 | 2 |  |
| Uaña larga |  |  |  | 5 | 3 | 5 |  |
| Antama |  |  |  |  |  |  | 6 |
| Puca antama |  |  |  | 7 | 7 | 11 |  |
| Chuño araqa (special for soups) | 7 |  |  |  |  |  |  |
| Chuño araqa azul | 8 |  |  |  |  |  |  |
| Azul suncu |  |  |  | 10 |  |  |  |
| Yuraq suncu |  |  |  | 11 |  | 10 |  |
| Sinqapa | 6 |  |  |  |  |  |  |
| Waka castillio |  |  |  |  |  |  | 2 |
| Zenka pizaya |  |  |  |  |  |  | 5 |
| Sucuptco |  |  |  |  |  |  | 7 |
| Suzu |  |  |  |  |  |  | 10 |
| Karu aracca |  |  |  |  |  |  |  |
| Yana putis |  |  |  |  |  |  |  |
| Uropaglia |  |  |  |  |  |  |  |
| Poccoya-Puccoya |  |  |  |  |  |  |  |
| Chiwaco-Chihuaco |  |  |  |  |  |  |  |
| Loye cocha |  |  |  |  |  |  |  |
| Ccapa quiña |  |  |  |  |  |  |  |
| Laicusha |  |  |  |  |  |  |  |

**Frequency (filled cells) and order of mention (sequence of numbers) of the varieties of araq papas recorded in interviews and workshops in the communities studied. The information was the base for estimating the Sutrop and Smith indexes reported in Table 2. Names of persons are abbreviated to respect the anonymity, numbers in parentheses are the participants in workshops.**

| Variety | Hild. Cconchayoc  (4) | Ruf. Cconchayoc  (2) | Franc. Huancacayo  (10) | Pasc. Pallpapallpa (2) | Jua. Pallpapallpa  (2) | Pallpapallpa  Group (4) |
| --- | --- | --- | --- | --- | --- | --- |
| Chabka-Qabka |  |  |  |  | 2 | 1 |
| Shakiña-Yuraq schaquiña-Schakiña blanca |  |  | 1 | 1 | 4 | 3 |
| Shakiña paccus |  |  |  |  |  |  |
| Shakiña runcu |  |  |  |  |  |  |
| Schakiña puca-Puca schaquiña- schaquiña roja |  |  | 2 |  | 5 | 2 |
| Schaquiña tellio-Tellio schaquiña |  |  |  |  |  |  |
| Schaquiña morada |  |  | 3 | 2 | 6 | 4 |
| Schaquiña redonda |  |  |  |  | 8 |  |
| Schaquiña larga |  |  |  |  | 9 | 7 |
| P’accush (amarilla) | 2 | 2 |  |  |  | 8 |
| Yana p’accush |  |  |  |  | 10 |  |
| Yuraq p'accush | 8 | 7 |  |  |  | 9 |
| Koyu paccush |  |  |  |  |  | 10 |
| Azulñahui paccush |  | 6 |  |  |  |  |
| Siccapisayu paccus |  |  |  |  |  |  |
| Siccapisayu runcu |  |  |  |  |  |  |
| Siccapisayu puca |  |  |  |  |  |  |
| Runcu | 1 | 1 | 4 | 7 | 7 | 5 |
| Runcu puca-puca runcu |  |  |  |  |  |  |
| Runcu paccus |  |  |  |  |  |  |
| Azul runcu |  |  |  |  |  |  |
| Yana runcu-Yara runcu | 7 |  |  |  |  |  |
| Chuchucoronta |  |  |  |  |  |  |
| Cuchicoronta |  |  |  |  |  |  |
| Quistillio | 3 | 4 |  |  |  |  |
| Quistillio puca |  |  |  |  |  |  |
| P'ocoya |  |  |  |  |  |  |
| Uaña |  | 3 |  |  |  |  |
| Yuraq uaña |  |  |  |  |  |  |
| Azul uaña |  |  |  |  |  |  |
| Uchu uaña | 9 | 10 |  |  |  |  |
| Ccatum uaña |  |  |  |  |  |  |
| Uaña amarilla |  |  |  |  |  |  |
| Uaña redonda |  |  |  |  |  |  |
| Uaña larga |  |  |  |  |  |  |
| Antama |  | 5 | 10 | 8 | 3 | 6 |
| Puca antama |  |  |  |  |  |  |
| Chuño araqa (special for soups) |  |  |  |  |  |  |
| Chuño araqa azul |  |  |  |  |  |  |
| Azul suncu |  |  |  |  |  |  |
| Yuraq suncu |  |  |  |  |  |  |
| Sinqapa |  |  |  |  |  |  |
| Waka castillio |  |  |  |  |  |  |
| Zenka pizaya |  |  |  |  |  |  |
| Sucuptco | 10 | 9 |  |  |  |  |
| Suzu | 6 | 8 |  |  |  |  |
| Karu aracca | 4 |  |  |  |  |  |
| Yana putis | 5 |  |  |  |  |  |
| Uropaglia |  |  | 6 |  |  |  |
| Poccoya-Puccoya |  |  | 7 | 6 |  | 9 |
| Chiwaco-Chihuaco |  |  | 8 | 5 | 1 | 8 |
| Loye cocha |  |  | 9 |  |  |  |
| Ccapa quiña |  |  |  | 3 |  | 7 |
| Laicusha |  |  |  | 4 |  | 10 |
